# Supplementary material for: Neocortical substrates of feelings evoked with music in the ACC, insula, and somatosensory cortex
Source: Springer Nature journal article supplement (doi:10.1038/s41598-021-89405-y), 2021-05-12
Supplement: 41598_2021_89405_MOESM2_ESM.pdf [file 41598_2021_89405_MOESM2_ESM.pdf]

# Neocortical substrates of feelings evoked with music in the ACC, insula, and somatosensory cortex

Stefan Koelsch, Vincent K.M. Cheung, Sebastian Jentschke, John-Dylan Haynes

## Supplementary Figure S2

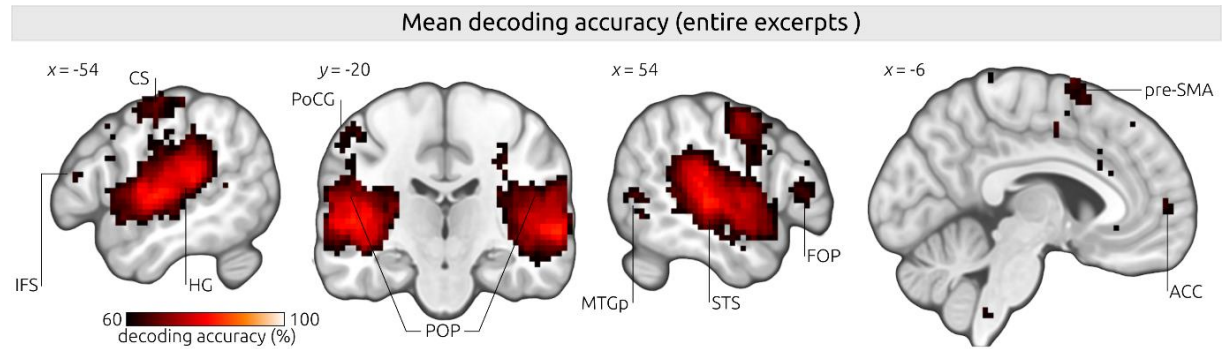

*The figure shows the statistical parametric map for the five-fold cross-validated decoding accuracy between joy and fear stimuli, mean-averaged across subjects. As in the main decoding analysis (see main text), no significant decoding results were obtained from subcortical regions such as amygdala, or striatum.*
