# Supplementary material for: Neocortical substrates of feelings evoked with music in the ACC, insula, and somatosensory cortex
Source: Springer Nature journal article supplement (doi:10.1038/s41598-021-89405-y), 2021-05-12
Supplement: 41598_2021_89405_MOESM3_ESM.pdf [file 41598_2021_89405_MOESM3_ESM.pdf]

# Neocortical substrates of feelings evoked with music in the ACC, insula, and somatosensory cortex

Stefan Koelsch, Vincent K.M. Cheung, Sebastian Jentschke, John-Dylan Haynes

## Supplementary Figure S3

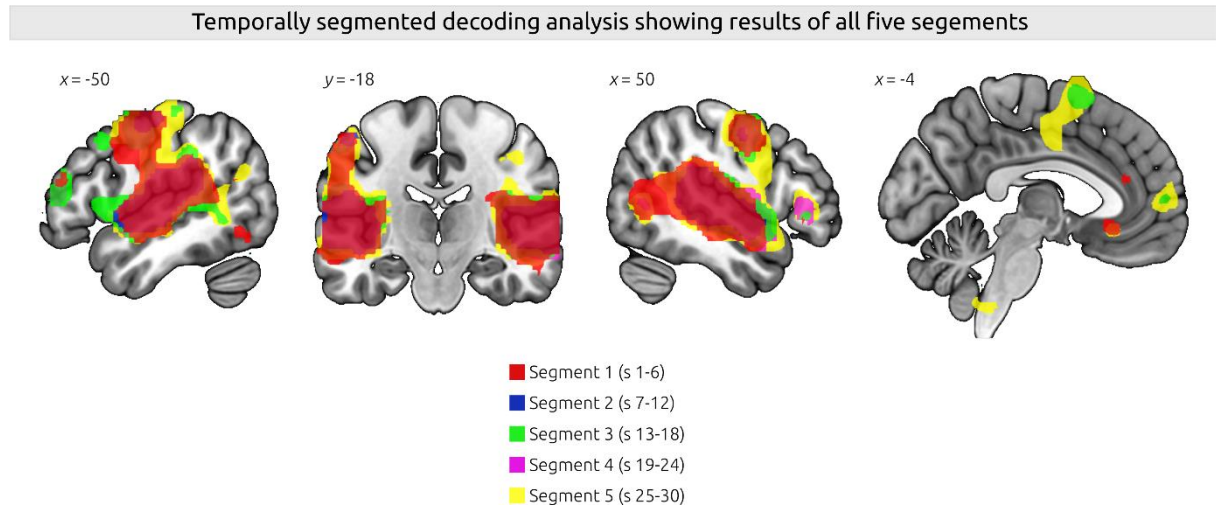

*Results of the temporally segmented decoding analysis, separately for all five time segments, showing clusters with voxels providing significant information about the difference between joy- and fear-music (after permutation-based  $t$ -tests and correction for multiple comparisons, all results were obtained without spatial smoothing). Note the increase in cluster size across segments in all clusters. For methods see main text.*
