# Supplementary material for: Neocortical substrates of feelings evoked with music in the ACC, insula, and somatosensory cortex
Source: Springer Nature journal article supplement (doi:10.1038/s41598-021-89405-y), 2021-05-12
Supplement: 41598_2021_89405_MOESM5_ESM.pdf [file 41598_2021_89405_MOESM5_ESM.pdf]

# Neocortical substrates of feelings evoked with music in the ACC, insula, and somatosensory cortex

Stefan Koelsch, Vincent K.M. Cheung, Sebastian Jentschke, John-Dylan Haynes

## Supplementary Figure S5

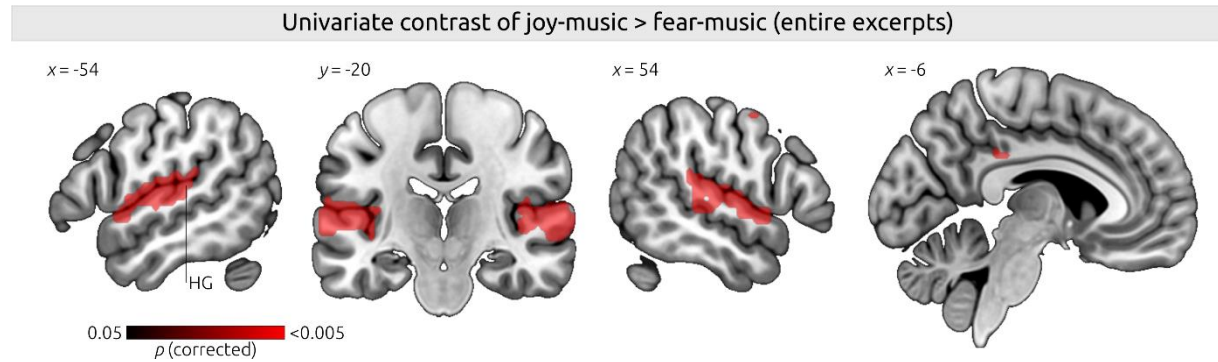

Statistical parametric map of brain regions showing increased activity for joyful compared to fearful music, analyzed using a mass-univariate approach. Because images were not smoothed during preprocessing, voxel-wise corrections for multiple comparisons were carried out using LISA [Lohmann, G. et al., 2018. LISA improves statistical analysis for fMRI. *Nature communications* 9, 1–9]. The reverse contrast (fear-music > joy-music) yielded no significant voxels.
