# Supplementary material for: Neocortical substrates of feelings evoked with music in the ACC, insula, and somatosensory cortex
Source: Springer Nature journal article supplement (doi:10.1038/s41598-021-89405-y), 2021-05-12
Supplement: 41598_2021_89405_MOESM6_ESM.pdf [file 41598_2021_89405_MOESM6_ESM.pdf]

# Neocortical substrates of feelings evoked with music in the ACC, insula, and somatosensory cortex

Stefan Koelsch, Vincent K.M. Cheung, Sebastian Jentschke, John-Dylan Haynes

## Supplementary Table S1: Overview of sound stimuli

| <b>Composer / artist</b>               | <b>Title</b>                                      | <b>ASIN Nr.</b> |
|----------------------------------------|---------------------------------------------------|-----------------|
| <i>Music stimuli evoking fear</i>      |                                                   |                 |
| Danny Elfman                           | The Killing                                       | B00000JC9R      |
| Seiko Kobuchi                          | Boss Battle (from: Biohazard Zero)                | n/a             |
| Michael Giacchino                      | Monsters Are Such Interesting People (from: Lost) | B000EHSVDM      |
| Michael Giacchino                      | Charlie's Dream (from: Lost)                      | B000I2IQ9M      |
| Ichiro Kohmoto                         | Unexpected Surprise (from: Resident Evil 0)       | n/a             |
| Masami Ueda & Saori Maeda              | Cold Sweat (from: Biohazard 3)                    | B000058A7Y      |
| <i>Music stimuli evoking happiness</i> |                                                   |                 |
| Jaco Pastorius                         | Soul intro / "The Chicken"                        | B0000C24JN      |
| Louis Armstrong                        | St. Louis Blues                                   | B006CBVRJY      |
| Craobh Rua                             | The Luck Penny                                    | B000003NHN      |
| Alfredo de Angelis                     | Pregonera                                         | B001P5LDTQ      |
| Orchestra Paraschiv Oprea              | Batuta de la Adancata                             | B00000DTI6      |
| Niccolò Paganini                       | Violin Concerto No. 1, 3rd movement               | B000001GHC      |
