# Supplementary material for: Neocortical substrates of feelings evoked with music in the ACC, insula, and somatosensory cortex
Source: Springer Nature journal article supplement (doi:10.1038/s41598-021-89405-y), 2021-05-12
Supplement: 41598_2021_89405_MOESM7_ESM.pdf [file 41598_2021_89405_MOESM7_ESM.pdf]

## Neocortical substrates of feelings evoked with music in the ACC, insula, and somatosensory cortex

Stefan Koelsch, Vincent K.M. Cheung, Sebastian Jentschke, John-Dylan Haynes

**Supplementary Table S2:** Statistics of the emotion ratings. The columns “Fear-music” and “Joy-music” provide means (with standard errors of mean in parentheses). Range for the valence, arousal, joy, and fear scales was from -3 (“not at all”) to 3 (“very much”).

|         | Fear-music   | Joy-music    | Significance of the difference       |
|---------|--------------|--------------|--------------------------------------|
| Valence | -1.74 (0.17) | 1.59 (0.13)  | $F_{(1,24)} = 209.13; p < .0001$ *** |
| Arousal | 0.24 (0.25)  | 0.95 (0.21)  | $F_{(1,24)} = 3.58; p = 0.071$ n.s.  |
| Joy     | -1.89 (0.16) | 1.62 (0.13)  | $F_{(1,24)} = 237.84; p < .0001$ *** |
| Fear    | 0.82 (0.22)  | -2.67 (0.10) | $F_{(1,24)} = 187.40; p < .0001$ *** |
